# Supplementary material for: Highly Water-Preserving Zwitterionic Betaine-Incorporated Collagen Sponges With Anti-oxidation and Anti-inflammation for Wound Regeneration
Source: PubMed Central journal article supplement (PMC7381158; doi:10.3389/fcell.2020.00491), 2020-07-15
Supplement: Image_1.pdf [file Image_1.pdf]

## Supporting Information

### Highly Water-Preserving Zwitterionic Betaine-incorporated Collagen Sponges with Anti-oxidation and Anti-inflammation for Wound Regeneration

Anqi Chen<sup>1†</sup>, Ying An<sup>1†</sup>, Wen Huang<sup>1</sup>, Tengxiao Xuan<sup>1</sup>, Qianwen Zhang<sup>2,3</sup>, Mengqi Ye<sup>2</sup>,  
Sha Luo<sup>2</sup>, Xuan Xuan<sup>3</sup>, Huacheng He<sup>2\*</sup>, Jie Zheng<sup>4,5\*</sup>, Jiang Wu<sup>1\*</sup>

<sup>1</sup>School of Pharmaceutical Sciences  
Key Laboratory of Biotechnology and Pharmaceutical Engineering  
Wenzhou Medical University, Wenzhou, 325035, China

<sup>2</sup>College of Chemistry and Materials Engineering  
Wenzhou University, Wenzhou, 325027, China

<sup>3</sup>Department of Dermatology  
The First Affiliated Hospital of Wenzhou Medical University, Wenzhou, 25000, China

<sup>4</sup>Department of Chemical, Biomolecular, and Corrosion Engineering  
The University of Akron, OH, 44325, USA

<sup>5</sup>Department of Polymer Engineering  
The University of Akron, OH, 44325, USA

#These authors contributed equally to this work.

\* Corresponding Author: hehc@wzu.edu.cn (HH); [zhengj@uakron.edu](mailto:zhengj@uakron.edu) (JZ);  
woody870402@hotmail.com (JW)

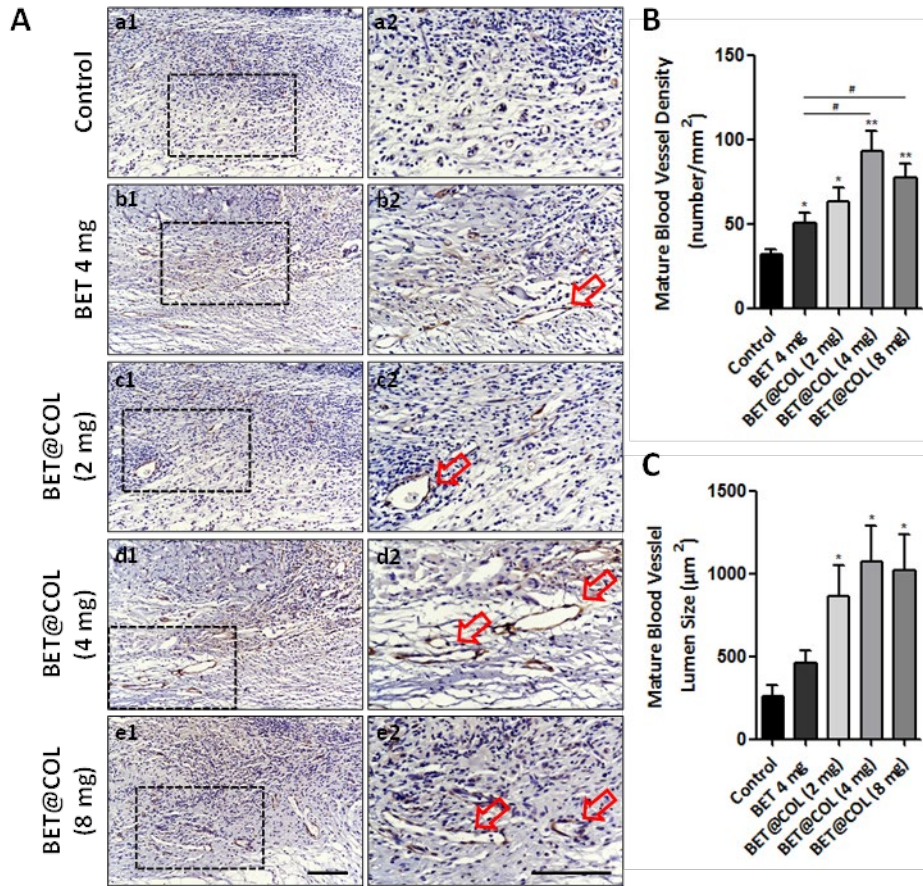

**Figure S1. BET@COL wound dressing enhances vascular regeneration and maturation.** (A) Representative images of immunohistochemical staining of  $\alpha$ -SMA ( $\alpha$ -smooth muscle actin) for the control group, free betaine solution (4 mg), and BET@COL (2 mg, 4 mg and 8 mg) groups on day seven. Red arrows indicate mature blood vessels with large lumen sizes. Scale bars = 100  $\mu$ m. (B) Quantitative results of the mature blood vessel density (number/mm<sup>2</sup>) for (A). n = 3. (C) Quantitative results of the mature blood vessel lumen size ( $\mu$ m<sup>2</sup>) for (A). n > 3. BET: betaine. COL: collagen. Statistical differences were performed using ANOVA. \*\* p < 0.01, \* p < 0.05, compared to control group, # p < 0.05.
